# Supplementary material
Source: HighWire-hosted journal article supplement (https://diabetes.diabetesjournals.org/content/suppl/2005/10/26/54.11.3190)
Supplement: db0610OnlineAppendixFigure1.pdf [file db0610OnlineAppendixFigure1.pdf]

## Supplementary figure 1. Basal glycerol release in isolated adipocytes and adipose tissue pieces

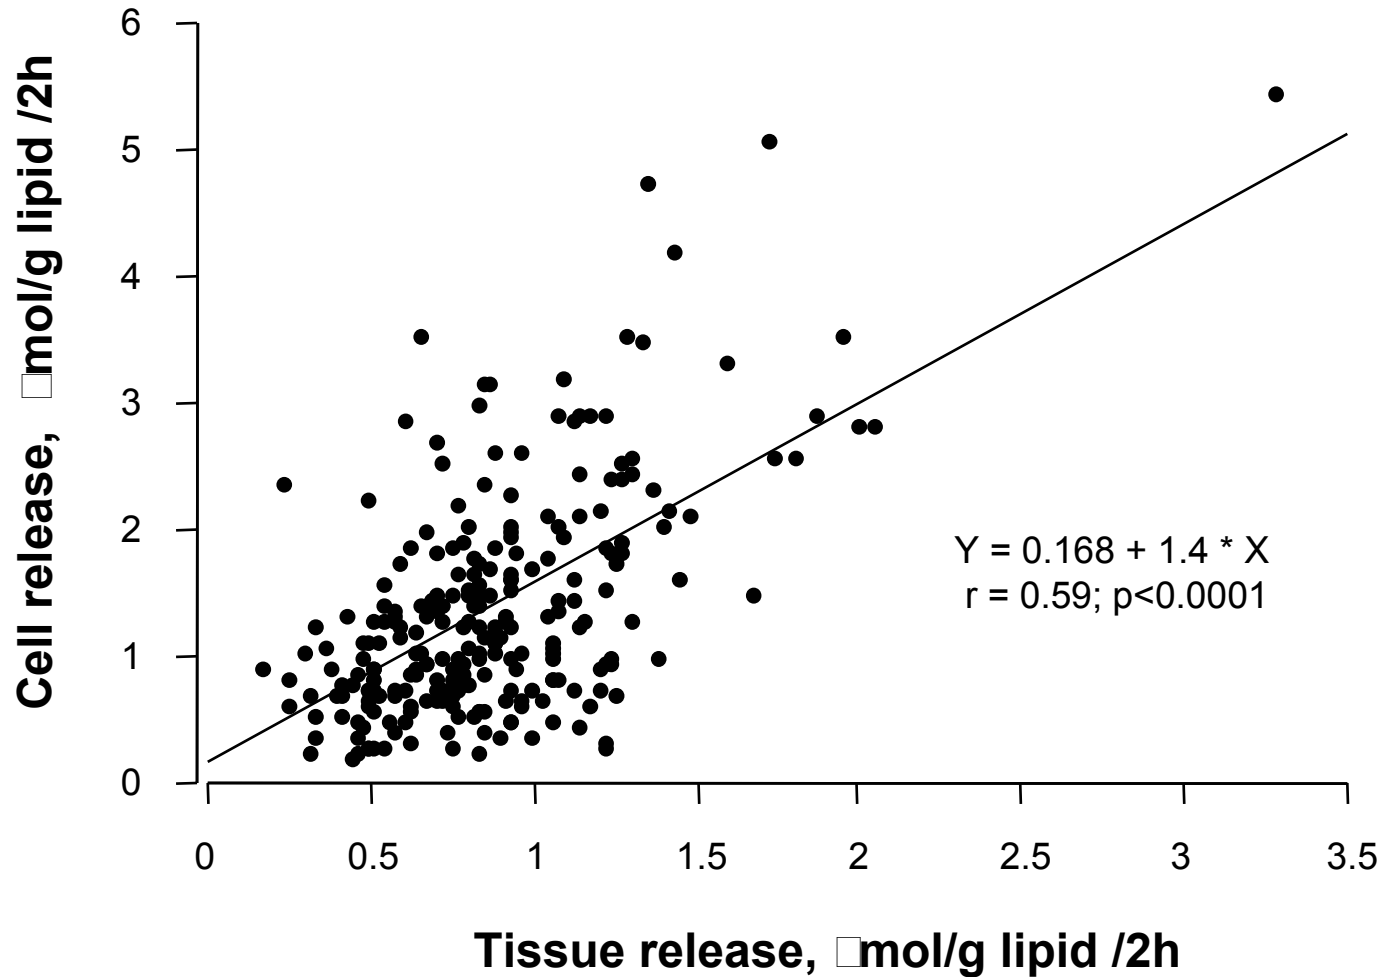

Subcutaneous adipose tissue from 251 healthy subjects (147 obese females, 56 non-obese females, 33 obese males, 15 non-obese males) was obtained by needle biopsy. Glycerol release was determined at 2 h of incubation and related to the amount of incubated lipids.
