# Supplementary material
Source: HighWire-hosted journal article supplement (https://diabetes.diabetesjournals.org/content/suppl/2005/10/26/54.11.3190)
Supplement: db0610OnlineAppendixTable1.pdf [file db0610OnlineAppendixTable1.pdf]

SUPPLEMENTARY TABLE 1 Glycerol release from mature fat cells and differentiated preadipocytes

|                                    | Non obese subjects | Obese subjects | p-value |
|------------------------------------|--------------------|----------------|---------|
| <b>Mature fat cells</b>            |                    |                |         |
| Basal lipolysis                    |                    |                |         |
| nmol/ug protein                    | 0.51 ± 0.30        | 0.74 ± 0.35    | <0.001  |
| µmol/g lipid                       | 1.02 ± 0.63        | 1.45 ± 0.74    | 0.001   |
| µmol/10 <sup>7</sup> cells         | 4.8 ± 4.4          | 11.1 ± 5.5     | <0.001  |
| Noradrenaline-induced lipolysis    |                    |                |         |
| nmol/µg protein                    | 1.8 ± 1.0          | 1.1 ± 0.3      | < 0.01  |
| µmol/g lipid                       | 3.6 ± 2.0          | 2.8 ± 1.3      | < 0.005 |
| µmol/10 <sup>7</sup> cells         | 9.9 ± 5.4          | 10.3 ± 5.9     | NS      |
| Noradrenaline/basal lipolysis      | 4.5 ± 2.1          | 2.1 ± 0.9      | < 0.001 |
| Isoprenaline-induced lipolysis     |                    |                |         |
| nmol/µg protein                    | 2.9 ± 1.8          | 1.7 ± 0.7      | < 0.001 |
| µmol/g lipid                       | 6.0 ± 2.4          | 3.8 ± 1.5      | <0.001  |
| µmol/10 <sup>7</sup> cells         | 18.6 ± 6.0         | 17.4 ± 7.3     | NS      |
| Isoprenaline/basal lipolysis       | 8.0 ± 4.1          | 3.1 ± 1.5      | < 0.001 |
| <b>Preadipocytes</b>               |                    |                |         |
| Basal lipolysis<br>pmol/ug protein | 81 ± 64            | 44 ± 34        | < 0.001 |
| Noradrenaline-induced lipolysis    |                    |                |         |
| pmol/µg protein                    | 494 ± 347          | 156 ± 125      | < 0.001 |
| Noradrenaline/basal lipolysis      | 8.9 ± 6.0          | 3.5 ± 2.9      | < 0.001 |
| Isoprenaline-induced lipolysis     |                    |                |         |
| pmol/µg protein                    | 706 ± 510          | 480 ± 33       | < 0.001 |
| Isoprenaline/basal lipolysis       | 10.4 ± 4.6         | 6.8 ± 4.7      | < 0.001 |

Values are means ± SD. They were compared by Student's t-test. NS = not significant
